# Supplementary material for: Characterization of aminopeptidase encoding gene anp-1 and its association with development in Caenorhabditis elegans
Source: PeerJ. 2019 Nov 12;7:e7944. doi: 10.7717/peerj.7944 (PMC6857582; doi:10.7717/peerj.7944)
Supplement: Supplemental Information 8 [file peerj-07-7944-s008.xlsx]

## Sheet: Sheet1
gna-2-F: AACTTCTGGAGCAACT
gna-2-R: CGACTACAAGAGTGGC
klp-5-F: GGCTACCGACTTTGCTG
klp-5-R: CTCCACTTTCGCCTTGT
mex-1-F: ACCAATCCCGACGAATC
mex-1-R: GAGGAGCACTGTATCCACTA
vit-2-F: ACAAGGAGGAACAATCTG
Vit-2-R: GTAACGAAGTCCGTAAGC
mex-5-F: CAAGTGGGAGTGGAGATT
mex-5-R: GATGTTCCTGTTGCGATT
col-7-F: TATGGCTCGTAGCGTCTT
col-7-RTTATCTCCTGATGCTCCTG
daf-18-F: CTATCGGTTATCCAGCAA
daf-18-R: AAGTTATCCGCATCGTAG
lip-1-F: TCCCAGTTTCCGACCCTT
lip-1-R: CCGCCTTGATCTTCACCTT
rskn-1-F: AAAAGTACGTGGACGAG
rskn-1-R: GAACGGATGCGAAATA
haf-4-F: TGTCGGATACAGTTGCG
haf-4-R: TGAATGTGACGAGGGAG
haf-9-F: TGGGCTTCACCTTCCG
haf-9-R: TCACCAACTGCCAACC
col-10-F: GTCAACCCATTCAACTCTAT
col-10-R: GTCTCCCTTTGGTCCTG
ftn-1-F: ACGCCTCCTATGTCTATCT
fnt-1-R: CATGGCAACACGTCCTCC
mlt-11-F: GCCTGTGCGTATTGCTCT
mlt-11-R: CTCCGTTCCTCAAGTAGTATCT
glt-7-F: AAAGTCCGAGTGATAGT
glt-7-R: ATAAAGCCATTGTAGTG
lin-22-F: ACCTCCAACAACTCCG
lin-22-R: GCATCATTGGGTTCAG
unc-52-F: AGGCGTGCGGAAACAA
unc-52-R: ATCGCCATCGCAAAGC
ins-7-F: TTCAATTAGGTCCAGCAGAA
ins-7-R: CATTCTTCACGGCAACATT
F49E2.5-F: AGAGATTGTTGAGGAAGTGT
F49E2.5-R: TTCGGTTGTCTGTGGAATT
hop-1-F: ATTATGCTCGCAGGTC
hop-1-R: GATTCGCAGTTTCCAC
gpd-1-F: AGATGTTTCCGTCGTT
gpd-1-R: GGATTCCCTTCATTGGT
