# Supplementary material for: Characterization of aminopeptidase encoding gene anp-1 and its association with development in Caenorhabditis elegans
Source: PeerJ. 2019 Nov 12;7:e7944. doi: 10.7717/peerj.7944 (PMC6857582; doi:10.7717/peerj.7944)
Supplement: Supplemental Information 9 [file peerj-07-7944-s009.xlsx]

## Sheet: The list of DEGs
Gene_id	Gene_name	FC(RB804/N2)	Log2FC(RB804/N2)	Pvalue	Padjust	Significant	Regulate	N2_1_Fpkm	N2_2_Fpkm	RB804_1_Fpkm	RB804_2_Fpkm	N2_Fpkm	RB804_Fpkm
WBGene00002090	ins-7	0.392	-1.352	0.0123	0.2269	yes	down	147.164	218.645	86.232	44.378	182.904	65.305
WBGene00002193	kin-5	0.316	-1.663	0.005455	0.1945	yes	down	16.765	24.709	7.058	1.431	20.737	4.245
WBGene00000530	clh-3	0.472	-1.084	0.01555	0.2612	yes	down	10.953	16.932	6.101	5.827	13.942	5.964
WBGene00001647	gna-2	0.217	-2.207	0.0002152	0.04842	yes	down	38.287	175.36	17.259	9.385	106.824	13.322
WBGene00001102	dsh-2	0.407	-1.296	0.01512	0.2562	yes	down	32.964	99.052	20.205	24.065	66.008	22.135
WBGene00001413	fem-3	0.248	-2.011	0.0003054	0.05464	yes	down	22.491	69.071	8.961	5.469	45.781	7.215
WBGene00001599	glh-2	0.335	-1.577	0.003953	0.1919	yes	down	44.905	121.266	27.373	15.815	83.085	21.594
WBGene00001605	gln-4	0.418	-1.259	0.04435	0.3584	yes	down	29.185	36.17	16.117	1.953	32.678	9.035
WBGene00000797	crn-4	0.372	-1.426	0.01074	0.2231	yes	down	13.869	37.2	7.795	6.88	25.535	7.338
WBGene00001164	efn-3	0.341	-1.551	0.01785	0.2648	yes	down	9.936	34.743	6.162	1.431	22.34	3.796
WBGene00001595	gld-1	0.354	-1.5	0.006882	0.2153	yes	down	660.734	1724.9	460.839	181.777	1192.82	321.308
WBGene00001839	hdl-1	0.394	-1.344	0.03397	0.3236	yes	down	4.038	7.861	2.529	0.409	5.95	1.469
WBGene00002130	inx-8	0.357	-1.485	0.007275	0.2153	yes	down	56.999	185.376	40.532	26.498	121.188	33.515
WBGene00003918	par-3	0.456	-1.134	0.03105	0.3157	yes	down	22.74	63.071	17.246	17.686	42.905	17.466
WBGene00000465	cpg-1	0.181	-2.466	0.0001799	0.04842	yes	down	142.465	1385.64	62.516	11.665	764.052	37.09
WBGene00001814	haf-4	2.062	1.044	0.008757	0.2231	yes	up	266.15	144.368	385.728	485.985	205.259	435.856
WBGene00000156	apr-1	0.377	-1.408	0.002235	0.1557	yes	down	15.192	27.42	7.144	6.809	21.306	6.976
WBGene00000023	abt-5	0.365	-1.453	0.01019	0.2231	yes	down	5.985	7.786	2.921	0.808	6.886	1.865
WBGene00002208	kin-26	0.245	-2.028	0.0006389	0.07069	yes	down	10.991	20.863	3.535	1.145	15.927	2.34
WBGene00002144	inx-22	0.255	-1.972	0.0007942	0.07862	yes	down	39.429	157.266	21.334	10.642	98.347	15.988
WBGene00003067	lrg-1	0.395	-1.339	0.009956	0.2231	yes	down	23.565	53.405	15.417	9.804	38.485	12.611
WBGene00000730	col-157	2.728	1.448	0.009163	0.2231	yes	up	275.013	60.179	488.531	692.419	167.596	590.475
WBGene00000143	apc-2	0.393	-1.346	0.004387	0.1919	yes	down	33.923	54.709	18.719	14.394	44.316	16.556
WBGene00000226	atl-1	0.432	-1.21	0.006014	0.1982	yes	down	13.063	12.387	5.867	3.609	12.725	4.738
WBGene00000546	clp-6	0.295	-1.762	0.00432	0.1919	yes	down	17.408	44.39	9.059	1.707	30.899	5.383
WBGene00000885	cyn-9	0.463	-1.111	0.009282	0.2231	yes	down	72.757	98.835	41.268	31.64	85.796	36.454
WBGene00001683	gpd-1	0.302	-1.725	0.004869	0.1945	yes	down	279.434	1646.8	248.494	114.202	963.115	181.348
WBGene00001044	dnj-26	0.428	-1.223	0.03163	0.3168	yes	down	9.553	20.57	6.383	3.793	15.062	5.088
WBGene00001063	dpy-1	3.465	1.793	0.003791	0.1919	yes	up	30.672	2.986	89.006	143.982	16.829	116.494
WBGene00002240	ksr-2	0.45	-1.153	0.03306	0.3205	yes	down	20.506	58.186	17.872	11.757	39.346	14.814
WBGene00003458	msp-65	0.401	-1.319	0.04023	0.3501	yes	down	7455.03	11534.8	4258.86	332.771	9494.91	2295.81
WBGene00006974	zen-4	0.451	-1.148	0.02898	0.3062	yes	down	32.59	95.792	24.992	24.249	64.191	24.62
WBGene00002251	lat-1	0.482	-1.054	0.02405	0.2862	yes	down	53.192	108.935	36.383	34.043	81.064	35.213
WBGene00000742	col-169	2.256	1.174	0.03676	0.3403	yes	up	33.952	7.833	51.113	65.489	20.892	58.301
WBGene00000665	col-90	2.572	1.363	0.01618	0.2647	yes	up	297.973	62.835	440.683	758.522	180.404	599.602
WBGene00000019	abt-1	0.383	-1.386	0.02105	0.2818	yes	down	9.84	4.828	2.246	0.716	7.334	1.481
WBGene00001606	gln-5	0.198	-2.339	0.0002313	0.04842	yes	down	85.523	588.642	43.957	13.065	337.083	28.511
WBGene00003656	nhr-66	0.459	-1.124	0.004635	0.1945	yes	down	50.564	67.162	25.827	24.249	58.863	25.038
WBGene00003219	mes-1	0.281	-1.829	0.004164	0.1919	yes	down	1.525	9.694	0.859	0.757	5.61	0.808
WBGene00000863	cya-1	0.408	-1.292	0.005583	0.1945	yes	down	41.395	74.258	24.01	17.41	57.826	20.71
WBGene00000271	brf-1	0.426	-1.232	0.005195	0.1945	yes	down	23.316	37.323	11.219	12.022	30.319	11.62
WBGene00000474	cey-3	0.425	-1.236	0.02039	0.2786	yes	down	855.211	2381.05	720.528	425.893	1618.13	573.211
WBGene00002192	kin-4	0.482	-1.052	0.03484	0.3285	yes	down	38.47	91.266	26.588	28.318	64.868	27.453
WBGene00000657	col-81	0.325	-1.622	0.00544	0.1945	yes	down	2057.39	5774.52	1648.44	740.12	3915.95	1194.28
WBGene00001686	gpd-4	0.34	-1.558	0.007332	0.2153	yes	down	217.582	848.475	175.937	84.013	533.029	129.975
WBGene00000417	ced-3	0.308	-1.699	0.004288	0.1919	yes	down	44.646	216.633	35.622	21.346	130.639	28.484
WBGene00002206	kin-24	0.455	-1.137	0.0369	0.3403	yes	down	28.37	23.14	14.484	4.447	25.755	9.466
WBGene00002198	kin-14	0.371	-1.429	0.002097	0.1517	yes	down	40.1	49.02	18.204	10.141	44.56	14.172
WBGene00001597	gld-3	0.281	-1.833	0.001006	0.09011	yes	down	47.744	192.982	26.637	16.797	120.363	21.717
WBGene00000618	col-41	2.657	1.41	0.03061	0.3155	yes	up	326.353	15.184	649.775	968.473	170.769	809.124
WBGene00001023	dnj-5	0.49	-1.03	0.03406	0.3236	yes	down	125.249	292.667	94.272	86.579	208.958	90.425
WBGene00000275	bub-1	0.5	-1	0.02344	0.2862	yes	down	107.851	184.46	75.736	58.445	146.156	67.091
WBGene00001650	gon-1	0.378	-1.404	0.018	0.2648	yes	down	21084.3	32168.5	11531.7	931.087	26626.4	6231.39
WBGene00000094	agt-2	0.422	-1.246	0.01447	0.2518	yes	down	17.628	28.687	10.102	6.43	23.157	8.266
WBGene00000939	dcr-1	0.454	-1.138	0.003153	0.1913	yes	down	17.331	21.865	8.347	8.158	19.598	8.252
WBGene00000729	col-156	2.415	1.272	0.02614	0.2909	yes	up	211.491	39.175	340.286	433.121	125.333	386.703
WBGene00000144	apc-10	0.479	-1.062	0.0298	0.3097	yes	down	94.289	132.557	66.309	32.417	113.423	49.363
WBGene00000866	cyb-2.1	0.184	-2.44	8.105e-05	0.04842	yes	down	51.063	327.543	21.739	11.031	189.303	16.385
WBGene00001600	glh-3	0.401	-1.32	0.008679	0.2231	yes	down	27.603	66.019	16.743	15.018	46.811	15.88
WBGene00003452	msp-59	0.41	-1.285	0.04361	0.3567	yes	down	18737.3	26685.2	10792.2	955.868	22711.2	5874.05
WBGene00000460	ceh-39	0.333	-1.586	0.0106	0.2231	yes	down	6.388	33.307	5.106	3.169	19.848	4.138
WBGene00000168	apx-1	0.296	-1.755	0.003612	0.1919	yes	down	43.457	174.142	30.7	10.387	108.799	20.544
WBGene00001214	ego-1	0.485	-1.044	0.02223	0.2825	yes	down	16.468	28.8	11.33	8.536	22.634	9.933
WBGene00000913	daf-18	0.205	-2.283	0.0001407	0.04842	yes	down	35.966	194.816	16.387	9.957	115.391	13.172
WBGene00001997	hpr-9	0.382	-1.387	0.01067	0.2231	yes	down	16.765	27.269	9.562	3.721	22.017	6.641
WBGene00000599	col-10	2.075	1.053	0.04113	0.3524	yes	up	4585.86	1196.87	6924.78	7143.54	2891.37	7034.16
WBGene00001569	meg-3	0.195	-2.359	0.0003485	0.05464	yes	down	2.714	51.335	1.547	1.441	27.024	1.494
WBGene00000259	bpl-1	0.493	-1.021	0.008066	0.2166	yes	down	30.806	30.501	14.484	14.507	30.654	14.495
WBGene00003231	mex-6	0.202	-2.306	0.000231	0.04842	yes	down	79.615	517.048	41.612	14.956	298.332	28.284
WBGene00001571	gei-14	0.292	-1.776	0.000613	0.07069	yes	down	11.154	24.746	3.891	4.202	17.95	4.046
WBGene00001487	frk-1	0.418	-1.26	0.0294	0.309	yes	down	35.688	47.811	21.481	5.244	41.749	13.363
WBGene00000585	cogc-2	0.486	-1.04	0.01472	0.2518	yes	down	40.493	62.768	22.402	23.922	51.63	23.162
WBGene00000408	cdk-7	0.498	-1.006	0.02861	0.3044	yes	down	73.477	135.874	44.018	51.289	104.675	47.654
WBGene00000264	brc-1	0.457	-1.129	0.02451	0.2862	yes	down	27.258	60.699	19.836	15.58	43.978	17.708
WBGene00001424	fis-1	0.326	-1.619	0.01217	0.2269	yes	down	47.802	81.392	19.885	1.973	64.597	10.929
WBGene00001514	xnd-1	0.491	-1.027	0.03284	0.3201	yes	down	77.054	147.921	60.798	37.999	112.487	49.398
WBGene00002221	klp-10	0.267	-1.907	0.0007544	0.07862	yes	down	17.398	65.159	8.396	6.717	41.279	7.556
WBGene00002368	let-99	0.318	-1.653	0.004766	0.1945	yes	down	27.977	117.26	20.745	11.204	72.618	15.975
WBGene00000496	chs-1	0.432	-1.21	0.02386	0.2862	yes	down	55.57	183.864	44.681	39.676	119.717	42.178
WBGene00000753	col-180	2.258	1.175	0.0241	0.2862	yes	up	2345.7	639.023	3424.15	4398.36	1492.36	3911.25
WBGene00001819	haf-9	2.011	1.008	0.009551	0.2231	yes	up	176.455	108.548	263.445	343.25	142.502	303.347
WBGene00001332	eri-1	0.482	-1.053	0.01799	0.2648	yes	down	25.368	40.224	14.239	14.404	32.796	14.322
WBGene00000771	cpb-2	0.389	-1.361	0.01411	0.2518	yes	down	39.534	44.995	19.971	5.316	42.264	12.643
WBGene00000512	ckb-2	0.433	-1.208	0.02344	0.2862	yes	down	51.331	151.531	34.161	39.492	101.431	36.826
WBGene00001973	hmg-3	0.474	-1.077	0.01229	0.2269	yes	down	40.34	65.575	23.003	23.033	52.958	23.018
WBGene00000537	clk-2	0.401	-1.318	0.007219	0.2153	yes	down	15.461	25.852	5.88	9.088	20.657	7.484
WBGene00002276	lem-3	0.463	-1.11	0.01968	0.2742	yes	down	22.923	44.646	14.865	13.004	33.785	13.934
WBGene00001603	gln-2	0.316	-1.662	0.005526	0.1945	yes	down	191.983	270.151	81.027	13.392	231.067	47.209
WBGene00001046	dnj-28	0.413	-1.275	0.01792	0.2648	yes	down	29.694	72.954	22.684	11.992	51.324	17.338
WBGene00001016	dna-2	0.47	-1.088	0.02463	0.2862	yes	down	31.919	67.946	23.408	18.269	49.932	20.838
WBGene00003209	mel-26	0.457	-1.13	0.01749	0.2648	yes	down	56.347	116.079	34.382	36.292	86.213	35.337
WBGene00003043	lip-1	0.478	-1.064	0.03803	0.344	yes	down	65.708	176.164	51.592	50.277	120.936	50.934
WBGene00001511	fzy-1	0.392	-1.352	0.009077	0.2231	yes	down	80.91	222.746	53.715	45.758	151.828	49.737
WBGene00000001	aap-1	0.494	-1.016	0.01469	0.2518	yes	down	47.523	69.345	27.471	26.181	58.434	26.826
WBGene00000671	col-96	0.193	-2.372	0.0003486	0.05464	yes	down	18.818	309.212	12.533	3.21	164.015	7.871
WBGene00002231	knl-1	0.426	-1.231	0.002527	0.1584	yes	down	35.103	50.466	17.013	16.306	42.785	16.66
WBGene00001767	gst-19	3.038	1.603	0.01055	0.2231	yes	up	21.532	5.329	25.777	113.384	13.431	69.581
WBGene00000865	cyb-1	0.389	-1.364	0.00789	0.2153	yes	down	370.222	832.572	252.668	138.748	601.397	195.708
WBGene00001609	glp-1	0.422	-1.246	0.01061	0.2231	yes	down	30.538	62.702	20.487	13.525	46.62	17.006
WBGene00001869	him-10	0.442	-1.179	0.01647	0.2648	yes	down	34.892	74.324	23.433	18.678	54.608	21.056
WBGene00001110	duo-1	0.444	-1.172	0.02397	0.2862	yes	down	12.977	31.153	9.611	7.054	22.065	8.332
WBGene00002985	lig-1	0.445	-1.167	0.02202	0.2818	yes	down	26.203	70.951	19.259	25.609	48.577	22.434
WBGene00002136	inx-14	0.334	-1.583	0.003466	0.1919	yes	down	55.589	153.571	34.75	19.434	104.58	27.092
WBGene00003012	lin-26	0.47	-1.088	0.009575	0.2231	yes	down	69.698	106.337	40.544	36.977	88.017	38.76
WBGene00000772	cpb-3	0.458	-1.127	0.01679	0.2648	yes	down	66.801	115.436	46.498	27.551	91.119	37.024
WBGene00000878	cyn-2	0.369	-1.437	0.01144	0.2242	yes	down	350.359	428.399	173.298	40.126	389.379	106.712
WBGene00002297	ect-2	0.391	-1.353	0.01075	0.2231	yes	down	56.203	142.299	39.341	21.796	99.251	30.569
WBGene00001831	hcp-3	0.495	-1.014	0.04681	0.3691	yes	down	102.403	246.831	89.202	63.915	174.617	76.558
WBGene00000099	air-2	0.416	-1.264	0.00943	0.2231	yes	down	78.224	161.962	48.216	38.112	120.093	43.164
WBGene00002003	hse-5	0.493	-1.021	0.008175	0.2166	yes	down	39.179	47.66	20.61	19.455	43.419	20.032
WBGene00000257	bmk-1	0.49	-1.03	0.01103	0.2231	yes	down	45.615	64.318	26.87	23.278	54.966	25.074
WBGene00000101	aka-1	0.425	-1.236	0.004286	0.1919	yes	down	31.689	52.28	16.682	15.447	41.984	16.064
WBGene00001495	frm-9	0.422	-1.244	0.01858	0.2657	yes	down	15.94	17.159	5.818	1.84	16.549	3.829
WBGene00001040	dnj-22	0.468	-1.096	0.02756	0.2996	yes	down	36.561	76.507	25.348	21.295	56.534	23.322
WBGene00001778	gst-30	0.401	-1.318	0.04689	0.3691	yes	down	0.911	28.375	2.455	0.419	14.643	1.437
WBGene00001500	ftn-1	2.164	1.114	0.01091	0.2231	yes	up	36.829	47.594	87.214	121.041	42.212	104.127
WBGene00002226	klp-16	0.278	-1.848	0.001729	0.1336	yes	down	117.231	538.828	77.602	40.964	328.029	59.283
WBGene00002072	ima-1	0.306	-1.709	0.001168	0.09985	yes	down	34.451	88.29	17.43	11.624	61.371	14.527
WBGene00000473	cey-2	0.323	-1.631	0.004354	0.1919	yes	down	1679.17	5667.17	1191.33	519.353	3673.17	855.343
WBGene00000656	col-80	0.333	-1.585	0.0113	0.2238	yes	down	426.464	3497.64	508.564	307.122	1962.05	407.843
WBGene00000419	ced-5	0.486	-1.042	0.02136	0.2818	yes	down	11.174	19.795	6.739	6.921	15.485	6.83
WBGene00006929	vit-5	0.367	-1.445	0.02719	0.2979	yes	down	0.086	2.069	0.086	0	1.077	0.043
WBGene00000423	ced-9	0.495	-1.015	0.04038	0.3501	yes	down	62.14	156.803	50.671	45.043	109.471	47.857
WBGene00000717	col-144	2.367	1.243	0.02603	0.2909	yes	up	2287.51	462.491	3810.15	4274.86	1375	4042.5
WBGene00000418	ced-4	0.5	-1	0.01614	0.2647	yes	down	33.904	44.287	20.892	16.94	39.096	18.916
WBGene00001112	duo-3	0.48	-1.059	0.02404	0.2862	yes	down	21.158	36.491	12.422	10.693	28.825	11.558
WBGene00000867	cyb-2.2	0.207	-2.272	0.0002317	0.04842	yes	down	78.675	450.51	39.722	15.856	264.592	27.789
WBGene00003228	mex-1	0.179	-2.479	0.0001008	0.04842	yes	down	53.997	441.089	23.752	9.569	247.543	16.66
WBGene00001119	dyf-3	0.44	-1.184	0.02695	0.2979	yes	down	8.622	13.767	4.063	4.089	11.194	4.076
WBGene00002148	gon-14	0.421	-1.248	0.007579	0.2153	yes	down	32.533	64.961	18.376	17.747	48.747	18.062
WBGene00003037	lin-54	0.407	-1.296	0.01225	0.2269	yes	down	55.522	146.816	36.665	33.205	101.169	34.935
WBGene00000594	col-3	2.383	1.253	0.01865	0.2657	yes	up	598.719	154.677	1035.17	957.003	376.698	996.087
WBGene00000506	cic-1	0.449	-1.154	0.02536	0.2874	yes	down	28.907	63.449	18.633	16.091	46.178	17.362
WBGene00002131	inx-9	0.46	-1.119	0.01847	0.2657	yes	down	35.736	62.976	23.2	17.267	49.356	20.233
WBGene00002225	klp-15	0.233	-2.102	0.000474	0.06368	yes	down	98.202	515.187	54.82	28.246	306.695	41.533
WBGene00001867	him-8	0.429	-1.22	0.01115	0.2231	yes	down	24.083	40.554	13.355	10.918	32.319	12.136
WBGene00001653	gon-4	0.37	-1.434	0.003615	0.1919	yes	down	7.778	15.402	3.302	3.895	11.59	3.599
WBGene00000868	cyb-3	0.393	-1.346	0.02276	0.2854	yes	down	333.451	1753.98	350.634	258.746	1043.72	304.69
WBGene00002027	hsr-9	0.496	-1.012	0.02044	0.2786	yes	down	149.85	270.226	108.142	100.8	210.038	104.471
WBGene00000265	brd-1	0.496	-1.013	0.02724	0.2979	yes	down	26.912	48.019	17.983	15.713	37.465	16.848
WBGene00011352	rskn-1	0.352	-1.505	0.007896	0.2153	yes	down	23.968	95.783	15.651	16.03	59.876	15.841
WBGene00003133	mat-2	0.493	-1.021	0.03325	0.3207	yes	down	36.475	80.92	26.833	25.087	58.698	25.96
WBGene00002186	kel-10	0.394	-1.342	0.02486	0.2866	yes	down	81.111	110.277	46.399	7.821	95.694	27.11
WBGene00001816	haf-6	0.485	-1.043	0.02156	0.2818	yes	down	104.005	67.927	49.444	25.731	85.966	37.588
WBGene00000479	cgh-1	0.384	-1.379	0.01093	0.2231	yes	down	970.581	2561.88	737.848	346.45	1766.23	542.149
WBGene00000680	col-106	0.32	-1.644	0.01356	0.2453	yes	down	1254.72	5028.13	745.077	30.649	3141.43	387.863
WBGene00003229	mex-3	0.316	-1.66	0.005045	0.1945	yes	down	115.735	625.634	86.453	71.367	370.685	78.91
WBGene00003241	mig-5	0.479	-1.062	0.03086	0.3155	yes	down	35.017	77.603	21.678	26.457	56.31	24.068
WBGene00000467	cep-1	0.42	-1.252	0.007304	0.2153	yes	down	41.558	61.02	16.903	16.265	51.289	16.584
WBGene00001482	fog-2	0.46	-1.121	0.03741	0.3416	yes	down	24.505	65.206	20.045	16.367	44.855	18.206
WBGene00001715	grl-6	2.691	1.428	0.03082	0.3155	yes	up	3.904	0.387	8.85	14.936	2.146	11.893
WBGene00001832	hcp-4	0.456	-1.133	0.01266	0.2312	yes	down	72.498	131.376	46.51	37.171	101.937	41.84
WBGene00002229	klp-19	0.422	-1.243	0.02193	0.2818	yes	down	90.501	301.445	75.896	60.132	195.973	68.014
WBGene00000770	cpb-1	0.49	-1.029	0.02499	0.2866	yes	down	73.601	105.42	51.088	28.113	89.511	39.6
WBGene00000596	col-7	0.399	-1.324	0.0479	0.3739	yes	down	36.196	121.899	26.772	0.583	79.047	13.677
WBGene00001607	gln-6	0.222	-2.171	0.0004727	0.06368	yes	down	149.265	911.413	87.385	33.102	530.339	60.243
WBGene00001830	hcp-2	0.383	-1.383	0.002503	0.1584	yes	down	49.825	87.883	27.177	18.872	68.854	23.024
WBGene00012186	mlt-11	3.494	1.805	9.825e-05	0.04842	yes	up	17.062	7.654	40.434	62.657	12.358	51.545
WBGene00000638	col-62	0.402	-1.314	0.04959	0.3781	yes	down	99.871	288.737	67.316	1.656	194.304	34.486
WBGene00001625	glt-7	2.173	1.12	0.02432	0.2862	yes	up	4.239	2.948	8.016	10.019	3.593	9.018
WBGene00000301	cav-1	0.335	-1.577	0.01851	0.2657	yes	down	4.45	33.109	0.381	4.007	18.78	2.194
WBGene00002228	klp-18	0.365	-1.456	0.007002	0.2153	yes	down	63.742	204.028	44.018	33.307	133.885	38.663
WBGene00002120	ins-37	0.408	-1.293	0.0469	0.3691	yes	down	44.435	68.135	24.243	2.331	56.285	13.287
WBGene00001872	him-14	0.374	-1.42	0.003792	0.1919	yes	down	10.78	18.907	5.401	3.946	14.843	4.673
WBGene00000544	clp-3	0.334	-1.583	0.006111	0.1982	yes	down	7.702	9.354	3.106	0.879	8.528	1.992
WBGene00003183	mei-1	0.388	-1.365	0.0123	0.2269	yes	down	72.594	239.735	54.145	43.581	156.165	48.863
WBGene00003008	lin-22	2.924	1.548	0.01587	0.2642	yes	up	4.824	2.126	13.772	24.535	3.475	19.154
WBGene00000389	cdc-25.4	0.333	-1.586	0.01781	0.2648	yes	down	22.702	29.32	5.904	0	26.011	2.952
WBGene00003177	mec-15	0.456	-1.132	0.01223	0.2269	yes	down	71.645	119.206	45.123	33.552	95.425	39.337
WBGene00002214	klc-1	0.366	-1.449	0.004941	0.1945	yes	down	42.776	107.055	25.495	19.679	74.916	22.587
WBGene00001985	hop-1	0.349	-1.52	0.00773	0.2153	yes	down	27.056	85.342	18.732	10.325	56.199	14.528
WBGene00001829	hcp-1	0.374	-1.417	0.005806	0.195	yes	down	38.009	91.086	24.722	15.099	64.547	19.91
WBGene00001246	elo-8	0.286	-1.807	0.002483	0.1584	yes	down	59.1	90.189	23.752	5.336	74.644	14.544
WBGene00002068	ify-1	0.39	-1.359	0.009503	0.2231	yes	down	313.348	700.298	219.329	107.158	506.823	163.244
WBGene00003220	mes-2	0.49	-1.03	0.01775	0.2648	yes	down	38.738	63.912	23.347	22.859	51.325	23.103
WBGene00001864	him-5	0.448	-1.16	0.018	0.2648	yes	down	26.98	94.148	15.417	11.583	60.564	13.5
WBGene00001998	hpr-17	0.488	-1.035	0.04783	0.3739	yes	down	35.794	86.674	32.025	19.843	61.234	25.934
WBGene00006926	vit-2	0.229	-2.124	0.001531	0.1252	yes	down	0.451	3.798	0.135	0	2.124	0.068
WBGene00009888	F49E2.5	2.038	1.027	0.005098	0.1945	yes	up	20.86	18.293	37.353	47.261	19.576	42.307
WBGene00001245	elo-7	0.391	-1.356	0.01966	0.2742	yes	down	46.488	52.535	23.052	5.275	49.511	14.163
WBGene00002992	lin-3	0.387	-1.371	0.01077	0.2231	yes	down	17.091	44.305	11.158	7.943	30.698	9.55
WBGene00003184	mei-2	0.251	-1.992	0.0008958	0.08425	yes	down	92.687	488.56	55.127	33.603	290.623	44.365
WBGene00003230	mex-5	0.222	-2.169	0.000637	0.07069	yes	down	210.455	1573.47	138.449	44.399	891.963	91.424
WBGene00006787	unc-52	2.036	1.026	0.001775	0.1336	yes	up	155.48	130.885	287.406	316.179	143.183	301.793
