# Supplementary material for: Characterization of aminopeptidase encoding gene anp-1 and its association with development in Caenorhabditis elegans
Source: PeerJ. 2019 Nov 12;7:e7944. doi: 10.7717/peerj.7944 (PMC6857582; doi:10.7717/peerj.7944)
Supplement: Supplemental Information 10 [file peerj-07-7944-s010.xlsx]

## Sheet: 基因集GO分类统计表
Term Type	GO Term	GO ID	genes_184 num	genes_184 percent
biological_process	multicellular organismal process	GO:0032501	77	77/184
biological_process	regulation of biological process	GO:0050789	98	98/184
biological_process	growth	GO:0040007	6	6/184
biological_process	reproductive process	GO:0022414	63	63/184
biological_process	response to stimulus	GO:0050896	45	45/184
biological_process	locomotion	GO:0040011	15	15/184
biological_process	cellular component organization or biogenesis	GO:0071840	62	62/184
biological_process	reproduction	GO:0000003	65	65/184
biological_process	biological regulation	GO:0065007	99	99/184
biological_process	biological adhesion	GO:0022610	4	4/184
biological_process	presynaptic process involved in chemical synaptic transmission	GO:0099531	1	1/184
biological_process	localization	GO:0051179	53	53/184
biological_process	developmental process	GO:0032502	81	81/184
biological_process	immune system process	GO:0002376	5	5/184
biological_process	negative regulation of biological process	GO:0048519	44	44/184
biological_process	single-organism process	GO:0044699	129	129/184
biological_process	metabolic process	GO:0008152	100	100/184
biological_process	behavior	GO:0007610	11	11/184
biological_process	positive regulation of biological process	GO:0048518	41	41/184
biological_process	signaling	GO:0023052	31	31/184
biological_process	cellular process	GO:0009987	136	136/184
biological_process	multi-organism process	GO:0051704	28	28/184
cellular_component	cell	GO:0005623	134	134/184
cellular_component	organelle	GO:0043226	96	96/184
cellular_component	organelle part	GO:0044422	56	56/184
cellular_component	cell part	GO:0044464	134	134/184
cellular_component	membrane	GO:0016020	54	54/184
cellular_component	synapse	GO:0045202	7	7/184
cellular_component	synapse part	GO:0044456	3	3/184
cellular_component	supramolecular complex	GO:0099080	9	9/184
cellular_component	membrane-enclosed lumen	GO:0031974	21	21/184
cellular_component	membrane part	GO:0044425	43	43/184
cellular_component	extracellular region	GO:0005576	9	9/184
cellular_component	macromolecular complex	GO:0032991	71	71/184
cellular_component	extracellular region part	GO:0044421	4	4/184
cellular_component	cell junction	GO:0030054	7	7/184
molecular_function	transcription factor activity, protein binding	GO:0000988	1	1/184
molecular_function	nucleic acid binding transcription factor activity	GO:0001071	6	6/184
molecular_function	transporter activity	GO:0005215	14	14/184
molecular_function	binding	GO:0005488	110	110/184
molecular_function	catalytic activity	GO:0003824	80	80/184
molecular_function	structural molecule activity	GO:0005198	18	18/184
molecular_function	molecular function regulator	GO:0098772	11	11/184
molecular_function	nutrient reservoir activity	GO:0045735	2	2/184
molecular_function	translation regulator activity	GO:0045182	4	4/184
molecular_function	molecular transducer activity	GO:0060089	2	2/184
molecular_function	signal transducer activity	GO:0004871	4	4/184
