# Supplementary material for: Characterization of aminopeptidase encoding gene anp-1 and its association with development in Caenorhabditis elegans
Source: PeerJ. 2019 Nov 12;7:e7944. doi: 10.7717/peerj.7944 (PMC6857582; doi:10.7717/peerj.7944)
Supplement: Supplemental Information 11 [file peerj-07-7944-s011.xlsx]

## Sheet: KEGG富集分析统计表
Num	Term	Pathway id	Database	Ratio_in_study	Ratio_in_pop	Pvalue_uncorrected	Pvalue_corrected
6	FoxO signaling pathway	map04068	KEGG PATHWAY	6/85	59/5368	0.0003	0.0137
3	Apoptosis - multiple species	map04215	KEGG PATHWAY	3/85	13/5368	0.001	0.0147
3	Nitrogen metabolism	map00910	KEGG PATHWAY	3/85	12/5368	0.0008	0.0171
3	Arginine biosynthesis	map00220	KEGG PATHWAY	3/85	17/5368	0.0022	0.02
3	Dorso-ventral axis formation	map04320	KEGG PATHWAY	3/85	16/5368	0.0018	0.0208
5	mTOR signaling pathway	map04150	KEGG PATHWAY	5/85	78/5368	0.0076	0.0485
3	ABC transporters	map02010	KEGG PATHWAY	3/85	25/5368	0.0069	0.0514
3	Alanine, aspartate and glutamate metabolism	map00250	KEGG PATHWAY	3/85	30/5368	0.0114	0.0643
3	Glyoxylate and dicarboxylate metabolism	map00630	KEGG PATHWAY	3/85	35/5368	0.0174	0.0871
2	Notch signaling pathway	map04330	KEGG PATHWAY	2/85	19/5368	0.0356	0.1602
4	Ubiquitin mediated proteolysis	map04120	KEGG PATHWAY	4/85	87/5368	0.0484	0.1978
2	DNA replication	map03030	KEGG PATHWAY	2/85	35/5368	0.1054	0.3954
2	Nucleotide excision repair	map03420	KEGG PATHWAY	2/85	37/5368	0.1157	0.4005
2	Glycolysis / Gluconeogenesis	map00010	KEGG PATHWAY	2/85	42/5368	0.1423	0.427
1	Glycosaminoglycan biosynthesis - heparan sulfate / heparin	map00534	KEGG PATHWAY	1/85	9/5368	0.1339	0.4304
1	Phenylalanine metabolism	map00360	KEGG PATHWAY	1/85	12/5368	0.1745	0.4362
2	Longevity regulating pathway - multiple species	map04213	KEGG PATHWAY	2/85	45/5368	0.1589	0.4469
2	Phosphatidylinositol signaling system	map04070	KEGG PATHWAY	2/85	45/5368	0.1589	0.4469
1	Histidine metabolism	map00340	KEGG PATHWAY	1/85	14/5368	0.2005	0.4748
1	Base excision repair	map03410	KEGG PATHWAY	1/85	16/5368	0.2257	0.5077
1	Homologous recombination	map03440	KEGG PATHWAY	1/85	20/5368	0.2737	0.5355
1	Mismatch repair	map03430	KEGG PATHWAY	1/85	18/5368	0.2501	0.5358
1	Arachidonic acid metabolism	map00590	KEGG PATHWAY	1/85	19/5368	0.262	0.5359
2	MAPK signaling pathway	map04010	KEGG PATHWAY	2/85	72/5368	0.3163	0.5475
1	Fanconi anemia pathway	map03460	KEGG PATHWAY	1/85	25/5368	0.3296	0.5494
2	Lysosome	map04142	KEGG PATHWAY	2/85	99/5368	0.4677	0.5539
2	Longevity regulating pathway - worm	map04212	KEGG PATHWAY	2/85	71/5368	0.3105	0.5588
1	Metabolism of xenobiotics by cytochrome P450	map00980	KEGG PATHWAY	1/85	39/5368	0.4646	0.565
1	Drug metabolism - cytochrome P450	map00982	KEGG PATHWAY	1/85	43/5368	0.498	0.5746
1	Tyrosine metabolism	map00350	KEGG PATHWAY	1/85	23/5368	0.3078	0.5771
2	Endocytosis	map04144	KEGG PATHWAY	2/85	108/5368	0.5138	0.5781
1	Basal transcription factors	map03022	KEGG PATHWAY	1/85	36/5368	0.4381	0.5799
1	Lysine degradation	map00310	KEGG PATHWAY	1/85	38/5368	0.4559	0.5862
1	ErbB signaling pathway	map04012	KEGG PATHWAY	1/85	38/5368	0.4559	0.5862
1	Inositol phosphate metabolism	map00562	KEGG PATHWAY	1/85	31/5368	0.3912	0.5867
1	Glutathione metabolism	map00480	KEGG PATHWAY	1/85	48/5368	0.5368	0.5891
1	RNA degradation	map03018	KEGG PATHWAY	1/85	48/5368	0.5368	0.5891
1	AGE-RAGE signaling pathway in diabetic complications	map04933	KEGG PATHWAY	1/85	29/5368	0.3713	0.5967
2	Autophagy - animal	map04140	KEGG PATHWAY	2/85	84/5368	0.3856	0.5984
1	Glycerophospholipid metabolism	map00564	KEGG PATHWAY	1/85	56/5368	0.5928	0.6204
1	Neuroactive ligand-receptor interaction	map04080	KEGG PATHWAY	1/85	35/5368	0.429	0.6228
1	Amino sugar and nucleotide sugar metabolism	map00520	KEGG PATHWAY	1/85	35/5368	0.429	0.6228
1	Tryptophan metabolism	map00380	KEGG PATHWAY	1/85	35/5368	0.429	0.6228
1	Wnt signaling pathway	map04310	KEGG PATHWAY	1/85	71/5368	0.6804	0.6959
1	Protein processing in endoplasmic reticulum	map04141	KEGG PATHWAY	1/85	136/5368	0.8891	0.8891
